# Supplementary material for: Development and evaluation of the content validity, practicability and feasibility of the Innovative dementia-oriented Assessment system for challenging behaviour in residents with dementia
Source: Springer Nature journal article supplement (doi:10.1186/s12913-017-2469-8), 2017-08-14
Supplement: MOESM1 [file 14215184]

**1. Which kind of challenging behaviour is observed?**

**Passive behaviour** for example to withdraw oneself, to be apathetic, not reacting, not communicating

**Restless, active, non aggressive behaviour** for example pacing and aimless wandering, pushing objects around, collecting things, monotonous repetitive activity/movements

**Physically aggressive behaviour** for example hitting, biting, scratching, pushing

**Verbally aggressive behaviour** for example cursing, screaming, threatening, insulting loudly

**Verbally non aggressive behaviour** for example repetitive questions, repetitive sentences, shouting, moaning, screaming, making noises

**Other behaviour** for example uninhibited

---

**2. Exactly how is the resident behaving in the challenging situation?**  
Please take notes (cues) \_\_\_\_\_

---

**3. When did the behaviour occur for the first time?**  **Unknown**  
Please write down period of time/moment: \_\_\_\_\_  **Unclear**

---

**4. Did a particular event take place shortly before the behaviour occurred for the first time?**  **Unknown**

Move in  New room neighbor  Illness  Change in nursing team  **Unclear**

Stay in hospital  Change of medications  Others, please note: \_\_\_\_\_

---

**5. At what time (daytime/night-time) does the behaviour usually occur (in the last fortnight)?**

|     |   |   |   |   |   |   |   |   |    |    |    |     |   |   |   |   |   |   |   |   |    |    |    |
|-----|---|---|---|---|---|---|---|---|----|----|----|-----|---|---|---|---|---|---|---|---|----|----|----|
| 1am | 2 | 3 | 4 | 5 | 6 | 7 | 8 | 9 | 10 | 11 | 12 | 1pm | 2 | 3 | 4 | 5 | 6 | 7 | 8 | 9 | 10 | 11 | 12 |
|-----|---|---|---|---|---|---|---|---|----|----|----|-----|---|---|---|---|---|---|---|---|----|----|----|

Remarks on the time: \_\_\_\_\_

Remarks: \_\_\_\_\_  **Unclear**

---

**6. For how long does the behaviour usually last (in the last fortnight)?**

Short period of time, a few minutes  \_\_\_\_\_ hours per day  Nearly the whole time  **Unclear**

Remarks: \_\_\_\_\_

---

**7. How often does the behaviour usually occur (in the last fortnight)?**

Rare (less than once a week)  Once a week  Several times per week  Once a day  **Unclear**

Several times per day  Several times an hour  Continuously/always

Remarks: \_\_\_\_\_

|            |                                                                                                                                                                  |                                                       |                                  |
|------------|------------------------------------------------------------------------------------------------------------------------------------------------------------------|-------------------------------------------------------|----------------------------------|
| <b>8.</b>  | <b>Where does the challenging behaviour <u>usually</u> happen (in the last fortnight)?</b>                                                                       |                                                       | <input type="checkbox"/> Unclear |
|            | Place: _____                                                                                                                                                     |                                                       |                                  |
|            | Remarks: _____                                                                                                                                                   |                                                       |                                  |
| <b>9.</b>  | <b>Who is <u>usually</u> present while the challenging behaviour occurs (in the last fortnight)?</b>                                                             | <input type="checkbox"/> No other people              |                                  |
|            | <input type="checkbox"/> Nurses/staff (who exactly?) _____                                                                                                       | <input type="checkbox"/> Doctors (who exactly?) _____ | <input type="checkbox"/> Unclear |
|            | <input type="checkbox"/> Other residents (who exactly?) _____                                                                                                    | <input type="checkbox"/> Others (who exactly?) _____  |                                  |
|            | <input type="checkbox"/> Friends/Family (who exactly?) _____                                                                                                     |                                                       |                                  |
|            | Remarks: _____                                                                                                                                                   |                                                       |                                  |
| <b>10.</b> | <b>Are there certain situations in which the behaviour <u>usually</u> occurs (in the last fortnight)?</b>                                                        | <input type="checkbox"/> No                           | <input type="checkbox"/> Unclear |
|            | Yes, which ones?: _____                                                                                                                                          |                                                       |                                  |
|            | _____                                                                                                                                                            |                                                       |                                  |
| <b>11.</b> | <b>Which emotions or reactions does the behaviour cause in the people involved?</b>                                                                              |                                                       | <input type="checkbox"/> Unclear |
|            | <input type="checkbox"/> Please take notes: _____                                                                                                                |                                                       |                                  |
| <b>12.</b> | <b>What consequences/effects do these emotions/reactions have on the resident's behaviour?</b>                                                                   |                                                       | <input type="checkbox"/> Unclear |
|            | <input type="checkbox"/> Non                                                                                                                                     |                                                       |                                  |
|            | <input type="checkbox"/> Positive consequences: Behaviour is influenced in a positive way                                                                        |                                                       |                                  |
|            | <input type="checkbox"/> Negative consequences: Behaviour is influenced in a negative way                                                                        |                                                       |                                  |
|            | Remarks: _____                                                                                                                                                   |                                                       |                                  |
| <b>13.</b> | <b>Are there any signs, that the behaviour shown by the resident is irksome or unpleasant?</b>                                                                   |                                                       |                                  |
|            | For the resident <input type="checkbox"/> No <input type="checkbox"/> Unclear <input type="checkbox"/> Yes, in what respect: _____                               |                                                       |                                  |
|            | For other residents <input type="checkbox"/> No <input type="checkbox"/> Unclear <input type="checkbox"/> Yes, in what respect: _____                            |                                                       |                                  |
|            | For the staff <input type="checkbox"/> No <input type="checkbox"/> Yes, in what respect: _____                                                                   |                                                       |                                  |
| <b>14.</b> | <b>Are there any signs, that the behaviour shown by the resident has an impact on the issue of safety?</b>                                                       |                                                       |                                  |
|            | Resident (puts himself/herself at risk) <input type="checkbox"/> No <input type="checkbox"/> Unclear <input type="checkbox"/> Yes, in what respect: _____        |                                                       |                                  |
|            | Other Residents (puts other residents at risk) <input type="checkbox"/> No <input type="checkbox"/> Unclear <input type="checkbox"/> Yes, in what respect: _____ |                                                       |                                  |
|            | Staff (puts staff at risk) <input type="checkbox"/> No <input type="checkbox"/> Yes, in what respect: _____                                                      |                                                       |                                  |

**IdA Innovative Dementia Orientated Assessment Tool**

**A: State of health and independence in everyday life**

Area I: Cognitive status

| <p><b>1. Can a delirium/ an acute clouding of consciousness be excluded?</b> <input type="checkbox"/> Yes <input type="checkbox"/> No <input type="checkbox"/> Unclear</p>                                                                                                                                                                                                                                                                                                                                                                                                                                                                                                                                                                                                                                                                                                                                                                                                                                                        | <p><b>What has to be done?</b></p> <ul style="list-style-type: none"> <li><input type="radio"/> Clarification necessary</li> <li><input type="radio"/> Interventions necessary</li> <li><input type="radio"/> Stays important</li> </ul> |                                  |                               |                               |                            |                                              |                      |                        |                                |                                            |                 |                     |                              |                                        |                                  |                     |                                                                                                                                                                                                       |
|-----------------------------------------------------------------------------------------------------------------------------------------------------------------------------------------------------------------------------------------------------------------------------------------------------------------------------------------------------------------------------------------------------------------------------------------------------------------------------------------------------------------------------------------------------------------------------------------------------------------------------------------------------------------------------------------------------------------------------------------------------------------------------------------------------------------------------------------------------------------------------------------------------------------------------------------------------------------------------------------------------------------------------------|------------------------------------------------------------------------------------------------------------------------------------------------------------------------------------------------------------------------------------------|----------------------------------|-------------------------------|-------------------------------|----------------------------|----------------------------------------------|----------------------|------------------------|--------------------------------|--------------------------------------------|-----------------|---------------------|------------------------------|----------------------------------------|----------------------------------|---------------------|-------------------------------------------------------------------------------------------------------------------------------------------------------------------------------------------------------|
| <p><b>2. Has the resident been diagnosed with dementia?</b> <input type="checkbox"/> No <input type="checkbox"/> Unclear</p> <p>Yes, by whom: _____, when: _____ Type of dementia: _____</p>                                                                                                                                                                                                                                                                                                                                                                                                                                                                                                                                                                                                                                                                                                                                                                                                                                      | <ul style="list-style-type: none"> <li><input type="radio"/> Clarification necessary</li> <li><input type="radio"/> Interventions necessary</li> <li><input type="radio"/> Stays important</li> </ul>                                    |                                  |                               |                               |                            |                                              |                      |                        |                                |                                            |                 |                     |                              |                                        |                                  |                     |                                                                                                                                                                                                       |
| <p><b>3. At what stage of dementia is the resident?</b></p> <p>Stage: _____</p> <p>According to: _____</p> <p><input type="checkbox"/> If unknown please assess here (according to...)</p> <table border="1" style="width: 100%; border-collapse: collapse; margin-top: 10px;"> <thead> <tr> <th style="width: 25%;">Severity</th> <th style="width: 25%;">Cognition</th> <th style="width: 25%;">Mode of living</th> <th style="width: 25%;">Mini-Mental State Examination</th> </tr> </thead> <tbody> <tr> <td><input type="radio"/> mild</td> <td>Solving of complicated tasks is not possible</td> <td>Limited but possible</td> <td>Less than 23-24 points</td> </tr> <tr> <td><input type="radio"/> moderate</td> <td>Solving of simple tasks partially possible</td> <td>Depends on help</td> <td>Less than 20 points</td> </tr> <tr> <td><input type="radio"/> severe</td> <td>Threads are not comprehensible anymore</td> <td>Independent living is impossible</td> <td>Less than 10 points</td> </tr> </tbody> </table> | Severity                                                                                                                                                                                                                                 | Cognition                        | Mode of living                | Mini-Mental State Examination | <input type="radio"/> mild | Solving of complicated tasks is not possible | Limited but possible | Less than 23-24 points | <input type="radio"/> moderate | Solving of simple tasks partially possible | Depends on help | Less than 20 points | <input type="radio"/> severe | Threads are not comprehensible anymore | Independent living is impossible | Less than 10 points | <ul style="list-style-type: none"> <li><input type="radio"/> Clarification necessary</li> <li><input type="radio"/> Interventions necessary</li> <li><input type="radio"/> Stays important</li> </ul> |
| Severity                                                                                                                                                                                                                                                                                                                                                                                                                                                                                                                                                                                                                                                                                                                                                                                                                                                                                                                                                                                                                          | Cognition                                                                                                                                                                                                                                | Mode of living                   | Mini-Mental State Examination |                               |                            |                                              |                      |                        |                                |                                            |                 |                     |                              |                                        |                                  |                     |                                                                                                                                                                                                       |
| <input type="radio"/> mild                                                                                                                                                                                                                                                                                                                                                                                                                                                                                                                                                                                                                                                                                                                                                                                                                                                                                                                                                                                                        | Solving of complicated tasks is not possible                                                                                                                                                                                             | Limited but possible             | Less than 23-24 points        |                               |                            |                                              |                      |                        |                                |                                            |                 |                     |                              |                                        |                                  |                     |                                                                                                                                                                                                       |
| <input type="radio"/> moderate                                                                                                                                                                                                                                                                                                                                                                                                                                                                                                                                                                                                                                                                                                                                                                                                                                                                                                                                                                                                    | Solving of simple tasks partially possible                                                                                                                                                                                               | Depends on help                  | Less than 20 points           |                               |                            |                                              |                      |                        |                                |                                            |                 |                     |                              |                                        |                                  |                     |                                                                                                                                                                                                       |
| <input type="radio"/> severe                                                                                                                                                                                                                                                                                                                                                                                                                                                                                                                                                                                                                                                                                                                                                                                                                                                                                                                                                                                                      | Threads are not comprehensible anymore                                                                                                                                                                                                   | Independent living is impossible | Less than 10 points           |                               |                            |                                              |                      |                        |                                |                                            |                 |                     |                              |                                        |                                  |                     |                                                                                                                                                                                                       |
| <p><b>4. Which of the resident's memory functions are still intact?</b></p> <p><b>a. Does s/he still remember important events from her/his past?</b> <input type="checkbox"/> Unclear</p> <p><input type="checkbox"/> Yes, most of the time/nearly everything</p> <p><input type="checkbox"/> Parts</p> <p><input type="checkbox"/> Only a few things/seldom</p> <p><input type="checkbox"/> Nearly nothing</p> <p style="margin-left: 200px;"><input type="checkbox"/> Ability to remember is unstable</p> <p style="margin-left: 200px;"><input type="checkbox"/> Ability to remember is stable</p> <p>Remarks: _____</p>                                                                                                                                                                                                                                                                                                                                                                                                      | <ul style="list-style-type: none"> <li><input type="radio"/> Clarification necessary</li> <li><input type="radio"/> Interventions necessary</li> <li><input type="radio"/> Stays important</li> </ul>                                    |                                  |                               |                               |                            |                                              |                      |                        |                                |                                            |                 |                     |                              |                                        |                                  |                     |                                                                                                                                                                                                       |
| <p><b>b. Can s/he her/his own personal data (name, age marital status, profession etc.)?</b> <input type="checkbox"/> Unclear</p> <p><input type="checkbox"/> Mostly unrestricted</p> <p><input type="checkbox"/> Partly restricted</p> <p><input type="checkbox"/> Strongly restricted</p> <p><input type="checkbox"/> Nearly nothing</p> <p style="margin-left: 200px;"><input type="checkbox"/> Ability to remember is unstable</p> <p style="margin-left: 200px;"><input type="checkbox"/> Ability to remember is stable</p> <p>Remarks: _____</p>                                                                                                                                                                                                                                                                                                                                                                                                                                                                            | <ul style="list-style-type: none"> <li><input type="radio"/> Clarification necessary</li> <li><input type="radio"/> Interventions necessary</li> <li><input type="radio"/> Stays important</li> </ul>                                    |                                  |                               |                               |                            |                                              |                      |                        |                                |                                            |                 |                     |                              |                                        |                                  |                     |                                                                                                                                                                                                       |

**IdA Innovative Dementia Orientated Assessment Tool**

**A: State of health and independence in everyday life**

|                          |                                                                                                                                                                                                                                                                                                                                                                                                                                                                                                                                                                                                           |                                                                                                                                                                                           |
|--------------------------|-----------------------------------------------------------------------------------------------------------------------------------------------------------------------------------------------------------------------------------------------------------------------------------------------------------------------------------------------------------------------------------------------------------------------------------------------------------------------------------------------------------------------------------------------------------------------------------------------------------|-------------------------------------------------------------------------------------------------------------------------------------------------------------------------------------------|
| Area I: Cognitive status | <p><b>4. Which of the resident's memory functions are still intact?</b></p> <p><b>c. Is s/he aware of her/his present situation (place of living, life circumstances, illnesses etc.)?</b> <input type="checkbox"/> Unclear</p> <p><input type="checkbox"/> Yes, most of the time/nearly everything</p> <p><input type="checkbox"/> Parts</p> <p><input type="checkbox"/> Only a few things/seldom</p> <p><input type="checkbox"/> Nearly nothing</p> <p><input type="checkbox"/> Ability to remember is unstable</p> <p><input type="checkbox"/> Ability to remember is stable</p> <p>Remarks: _____</p> | <p><b>What has to be done?</b></p> <p><input type="radio"/> Clarification necessary</p> <p><input type="radio"/> Interventions necessary</p> <p><input type="radio"/> Stays important</p> |
|                          | <p><b>d. Does s/he find her/his way around in the rooms that are important for her/his everyday life? (e.g. her/his private room, in the residential areas, in the home, outside the home)</b> <input type="checkbox"/> Unclear</p> <p><input type="checkbox"/> Mostly unrestricted</p> <p><input type="checkbox"/> Partly restricted</p> <p><input type="checkbox"/> Strongly restricted</p> <p><input type="checkbox"/> Nearly nothing</p> <p><input type="checkbox"/> Sense of orientation is unstable</p> <p><input type="checkbox"/> Sense of orientation is stable</p> <p>Remarks: _____</p>        | <p><input type="radio"/> Clarification necessary</p> <p><input type="radio"/> Interventions necessary</p> <p><input type="radio"/> Stays important</p>                                    |
|                          | <p><b>e. Does s/he still have sense of time (time of day, time of weeks, seasons etc.)?</b> <input type="checkbox"/> Unclear</p> <p><input type="checkbox"/> Mostly unrestricted</p> <p><input type="checkbox"/> Partly restricted</p> <p><input type="checkbox"/> Strongly restricted</p> <p><input type="checkbox"/> Nearly nothing</p> <p><input type="checkbox"/> Sense of time is unstable</p> <p><input type="checkbox"/> Sense of time is stable</p> <p>Remarks: _____</p>                                                                                                                         | <p><input type="radio"/> Clarification necessary</p> <p><input type="radio"/> Interventions necessary</p> <p><input type="radio"/> Stays important</p>                                    |
|                          | <p><b>f. Is s/he able to complete an activity (brushing teeth, eating her/his meal etc.)?</b> <input type="checkbox"/> Unclear</p> <p><input type="checkbox"/> Mostly unrestricted</p> <p><input type="checkbox"/> Partly restricted</p> <p><input type="checkbox"/> Strongly restricted</p> <p><input type="checkbox"/> Nearly nothing</p> <p><input type="checkbox"/> Ability is unstable</p> <p><input type="checkbox"/> Ability is stable</p> <p>Remarks: _____</p>                                                                                                                                   | <p><input type="radio"/> Clarification necessary</p> <p><input type="radio"/> Interventions necessary</p> <p><input type="radio"/> Stays important</p>                                    |

**IdA Innovative Dementia Orientated Assessment Tool**

**A: State of health and independence in everyday life**

|                                            |                                                                                                                                                                                                                                                                                                                                                                                                                                                                                                                                                                                                                                                                                                                                                                                                                                                                                                                                                                                                                                                                                                                                                                                      |                                                                                                                                                                                       |
|--------------------------------------------|--------------------------------------------------------------------------------------------------------------------------------------------------------------------------------------------------------------------------------------------------------------------------------------------------------------------------------------------------------------------------------------------------------------------------------------------------------------------------------------------------------------------------------------------------------------------------------------------------------------------------------------------------------------------------------------------------------------------------------------------------------------------------------------------------------------------------------------------------------------------------------------------------------------------------------------------------------------------------------------------------------------------------------------------------------------------------------------------------------------------------------------------------------------------------------------|---------------------------------------------------------------------------------------------------------------------------------------------------------------------------------------|
| Area I: Cognitive status                   | <p><b>4. Which of the resident's memory functions are still intact?</b></p> <p><b>g. Does she/he recognize important items of everyday life (agnosia)?</b> <span style="float: right;"><input type="checkbox"/> Unclear</span></p> <p><input type="checkbox"/> Mostly unrestricted<br/> <input type="checkbox"/> Partly restricted<br/> <input type="checkbox"/> Strongly restricted <span style="margin-left: 150px;"><input type="checkbox"/> Ability is unstable</span><br/> <input type="checkbox"/> Nearly nothing <span style="margin-left: 150px;"><input type="checkbox"/> Ability is stable</span></p> <p>Remarks: _____</p>                                                                                                                                                                                                                                                                                                                                                                                                                                                                                                                                                | <p><b>What has to be done?</b></p> <p><input type="radio"/> Clarification necessary<br/> <input type="radio"/> Interventions necessary<br/> <input type="radio"/> Stays important</p> |
|                                            | <p><b>h. Does s/he remember information, received a day or less beforehand?</b> <span style="float: right;"><input type="checkbox"/> Unclear</span></p> <p><input type="checkbox"/> Mostly unrestricted<br/> <input type="checkbox"/> Partly restricted<br/> <input type="checkbox"/> Strongly restricted <span style="margin-left: 150px;"><input type="checkbox"/> Ability is unstable</span><br/> <input type="checkbox"/> Nearly nothing <span style="margin-left: 150px;"><input type="checkbox"/> Ability is stable</span></p> <p>Remarks: _____</p>                                                                                                                                                                                                                                                                                                                                                                                                                                                                                                                                                                                                                           | <p><input type="radio"/> Clarification necessary<br/> <input type="radio"/> Interventions necessary<br/> <input type="radio"/> Stays important</p>                                    |
| Area II: Physical situation and discomfort | <p><b>5. Does s/he show any mobility-related impairment?</b></p> <p><b>Change of body / positional change</b> <input type="checkbox"/> No limitation <input type="checkbox"/> Limitations <span style="float: right;"><input type="checkbox"/> Unclear</span><br/> <b>Change of place / locomotion</b> <input type="checkbox"/> No limitation <input type="checkbox"/> Limitations <span style="float: right;"><input type="checkbox"/> Unclear</span><br/> <b>Stamina</b> <input type="checkbox"/> No limitation <input type="checkbox"/> Limitations <span style="float: right;"><input type="checkbox"/> Unclear</span><br/> <b>Coordination</b> <input type="checkbox"/> No limitation <input type="checkbox"/> Limitations <span style="float: right;"><input type="checkbox"/> Unclear</span><br/> <b>Movement need</b> <input type="checkbox"/> increased <input type="checkbox"/> decreased <input type="checkbox"/> Does not fit <span style="float: right;"><input type="checkbox"/> Unclear</span></p> <p>Other limitations: _____</p>                                                                                                                                    | <p><input type="radio"/> Clarification necessary<br/> <input type="radio"/> Interventions necessary<br/> <input type="radio"/> Stays important</p>                                    |
|                                            | <p><b>6. Does she/he have problems in connection with food or fluid intake?</b></p> <p><b>Hunger</b> <input type="checkbox"/> Yes <input type="checkbox"/> No <span style="float: right;"><input type="checkbox"/> Unclear</span><br/> <b>Thirst</b> <input type="checkbox"/> Yes <input type="checkbox"/> No <span style="float: right;"><input type="checkbox"/> Unclear</span><br/> <b>Oral health / dental status</b> <input type="checkbox"/> No limitation <input type="checkbox"/> Limitations <span style="float: right;"><input type="checkbox"/> Unclear</span><br/> <b>Ability to swallow</b> <input type="checkbox"/> No limitation <input type="checkbox"/> Limitations <span style="float: right;"><input type="checkbox"/> Unclear</span><br/> <b>Energy requirements</b> <input type="checkbox"/> increased <input type="checkbox"/> decreased <input type="checkbox"/> Does not fit <span style="float: right;"><input type="checkbox"/> Unclear</span><br/> <b>Independent food intake</b> <input type="checkbox"/> No limitation <input type="checkbox"/> Limitations <span style="float: right;"><input type="checkbox"/> Unclear</span></p> <p>Other: _____</p> | <p><input type="radio"/> Clarification necessary<br/> <input type="radio"/> Interventions necessary<br/> <input type="radio"/> Stays important</p>                                    |

**IdA Innovative Dementia Orientated Assessment Tool**

**A: State of health and independence in everyday life**

|                                                                                                                                                                                                                                                                                                                                                                                                                                                                                                                                                                                                                                                                               |                                                                                                                                                                                           |
|-------------------------------------------------------------------------------------------------------------------------------------------------------------------------------------------------------------------------------------------------------------------------------------------------------------------------------------------------------------------------------------------------------------------------------------------------------------------------------------------------------------------------------------------------------------------------------------------------------------------------------------------------------------------------------|-------------------------------------------------------------------------------------------------------------------------------------------------------------------------------------------|
| <p><b>7. Does s/he show limitations with bowel or bladder function?</b></p> <p>Urge to urinate/urinary retention    <input type="checkbox"/> increased    <input type="checkbox"/> decreased    <input type="checkbox"/> Does not fit    <input type="checkbox"/> Unclear</p> <p>Defecation    <input type="checkbox"/> Obstipation    <input type="checkbox"/> Diarrhoea    <input type="checkbox"/> Does not fit    <input type="checkbox"/> Unclear</p> <p>Urinary tract infection    <input type="checkbox"/> Yes    <input type="checkbox"/> No    <input type="checkbox"/> Unclear</p> <p>Other: _____</p>                                                              | <p><b>What has to be done?</b></p> <p><input type="radio"/> Clarification necessary</p> <p><input type="radio"/> Interventions necessary</p> <p><input type="radio"/> Stays important</p> |
| <p><b>8. Does s/he have sleep problems?</b></p> <p>Disturbed nightly sleep    <input type="checkbox"/> Yes    <input type="checkbox"/> No    <input type="checkbox"/> Unclear</p> <p>Circadian dysrhythmia    <input type="checkbox"/> Yes    <input type="checkbox"/> No    <input type="checkbox"/> Unclear</p> <p>Sleeps a lot at during the day    <input type="checkbox"/> Yes    <input type="checkbox"/> No    <input type="checkbox"/> Unclear</p> <p>Other sleeping problems: _____</p>                                                                                                                                                                              | <p><input type="radio"/> Clarification necessary</p> <p><input type="radio"/> Interventions necessary</p> <p><input type="radio"/> Stays important</p>                                    |
| <p><b>9. Does s/he have trouble with vital physical functions?</b></p> <p>Breathing trouble    <input type="checkbox"/> Yes    <input type="checkbox"/> No    <input type="checkbox"/> Unclear</p> <p>Circulatory disorders    <input type="checkbox"/> Yes    <input type="checkbox"/> No    <input type="checkbox"/> Unclear</p> <p>Blood pressure    <input type="checkbox"/> high    <input type="checkbox"/> low    <input type="checkbox"/> normal    <input type="checkbox"/> Does not fit    <input type="checkbox"/> Unclear</p> <p>Fever    <input type="checkbox"/> Yes    <input type="checkbox"/> No    <input type="checkbox"/> Unclear</p> <p>Other: _____</p> | <p><input type="radio"/> Clarification necessary</p> <p><input type="radio"/> Interventions necessary</p> <p><input type="radio"/> Stays important</p>                                    |
| <p><b>10. Are there signs of a depression?</b>    <input type="checkbox"/> Yes    <input type="checkbox"/> No    <input type="checkbox"/> Unclear</p>                                                                                                                                                                                                                                                                                                                                                                                                                                                                                                                         | <p><input type="radio"/> Clarification necessary</p> <p><input type="radio"/> Interventions necessary</p> <p><input type="radio"/> Stays important</p>                                    |
| <p><b>11. Is it possible that she/he is in pain?</b>    <input type="checkbox"/> Yes, see assessment according to    <input type="checkbox"/> No    <input type="checkbox"/> Unclear</p>                                                                                                                                                                                                                                                                                                                                                                                                                                                                                      | <p><input type="radio"/> Clarification necessary</p> <p><input type="radio"/> Interventions necessary</p> <p><input type="radio"/> Stays important</p>                                    |
| <p><b>12. Is it possible that she/he has delusions or hallucinations?</b></p> <p>Delusions    <input type="checkbox"/> Yes    <input type="checkbox"/> No    <input type="checkbox"/> Unclear</p> <p>Hallucinations    <input type="checkbox"/> Yes    <input type="checkbox"/> No    <input type="checkbox"/> Unclear</p>                                                                                                                                                                                                                                                                                                                                                    | <p><input type="radio"/> Clarification necessary</p> <p><input type="radio"/> Interventions necessary</p> <p><input type="radio"/> Stays important</p>                                    |
| <p><b>13. Does s/he take drugs, which causes adverse side effects?</b>    <input type="checkbox"/> No    <input type="checkbox"/> Unclear</p> <p><input type="checkbox"/> Yes, which medication and which side effects: _____</p>                                                                                                                                                                                                                                                                                                                                                                                                                                             | <p><input type="radio"/> Clarification necessary</p> <p><input type="radio"/> Interventions necessary</p> <p><input type="radio"/> Stays important</p>                                    |
| <p><b>14. Does s/he have other significant illnesses, physical impairment or discomfort?</b>    <input type="checkbox"/> No    <input type="checkbox"/> Unclear</p> <p><input type="checkbox"/> Yes, please note: _____</p>                                                                                                                                                                                                                                                                                                                                                                                                                                                   | <p><input type="radio"/> Clarification necessary</p> <p><input type="radio"/> Interventions necessary</p> <p><input type="radio"/> Stays important</p>                                    |

**IdA Innovative Dementia Orientated Assessment Tool**

**A: State of health and independence in everyday life**

**15. Is s/he emotionally burdened/stressed by being limited in self-maintenance/ self-care ability for daily life activities/everyday situations?**

- |                                                           |                                           |                                        |                                  |
|-----------------------------------------------------------|-------------------------------------------|----------------------------------------|----------------------------------|
| Dependency with movement/locomotion                       | <input type="checkbox"/> No burden/stress | <input type="checkbox"/> Burden/stress | <input type="checkbox"/> Unclear |
| Dependency with physical care                             | <input type="checkbox"/> No burden/stress | <input type="checkbox"/> Burden/stress | <input type="checkbox"/> Unclear |
| Dependency with getting dresses                           | <input type="checkbox"/> No burden/stress | <input type="checkbox"/> Burden/stress | <input type="checkbox"/> Unclear |
| Dependency with fluid/food intake                         | <input type="checkbox"/> No burden/stress | <input type="checkbox"/> Burden/stress | <input type="checkbox"/> Unclear |
| Dependency with excretion                                 | <input type="checkbox"/> No burden/stress | <input type="checkbox"/> Burden/stress | <input type="checkbox"/> Unclear |
| Other (for example getting in contact with others): _____ |                                           |                                        |                                  |

- Clarification necessary
- Interventions necessary
- Stays important

**16. Does nursing-assistance in everyday life activities/situations cause stress or burden for the resident?**

- Yes, which: \_\_\_\_\_  No  Unclear

- Clarification necessary
- Interventions necessary
- Stays important

**Summary**

**A 1. Can the challenging behaviour be explained by the type or stage of dementia?**

No

**Probably yes** please take down possible correlations

**To be taken into account in interactions with the resident**

Plan interventions:

**A 2. Can the identified cognitive impairments explain the challenging behaviour?**

No

- |                                                                                     |                                                                                    |
|-------------------------------------------------------------------------------------|------------------------------------------------------------------------------------|
| <input type="checkbox"/> Events form the past                                       | <input type="checkbox"/> Information about oneself                                 |
| <input type="checkbox"/> Present living situation                                   | <input type="checkbox"/> Orientation in important rooms                            |
| <input type="checkbox"/> Sense of time                                              | <input type="checkbox"/> Complete activities                                       |
| <input type="checkbox"/> Recognizing important everyday items                       | <input type="checkbox"/> Remembering information received a day or less beforehand |
| <input type="checkbox"/> <b>Probably yes</b> please take down possible correlations |                                                                                    |

**To be taken into account in interactions with the resident**

Plan interventions:

**A 3. Can the identified physical impairment or discomfort somehow related to the challenging behaviour?**

No

- |                                                                                     |                                                   |                                                               |
|-------------------------------------------------------------------------------------|---------------------------------------------------|---------------------------------------------------------------|
| <input type="checkbox"/> Mobility                                                   | <input type="checkbox"/> Fluid and food intake    | <input type="checkbox"/> Excretion functions                  |
| <input type="checkbox"/> Sleep                                                      | <input type="checkbox"/> Vital physical functions | <input type="checkbox"/> Depression                           |
| <input type="checkbox"/> Pain                                                       | <input type="checkbox"/> Delusions/hallucinations | <input type="checkbox"/> Medication with adverse side-effects |
| <input type="checkbox"/> Other illnesses/physical impairments                       |                                                   |                                                               |
| <input type="checkbox"/> <b>Probably yes</b> please take down possible correlations |                                                   |                                                               |
- 
- 

To be taken into account in interactions with the resident

Plan interventions:

**A 4. Can the identified stressful/burdening dependencies in everyday-life activities have provoked the challenging behaviour?**

No

- |                                                                                     |                                                                        |
|-------------------------------------------------------------------------------------|------------------------------------------------------------------------|
| <input type="checkbox"/> Emotional burden/stress by care dependencies               | <input type="checkbox"/> Emotional burden/stress by care interventions |
| <input type="checkbox"/> <b>Probably yes</b> please take down possible correlations |                                                                        |
- 
- 

To be taken into account in interactions with the resident

Plan interventions:



**IdA Innovative Dementia Orientated Assessment Tool**

**B: Communication**

|                                                                                                                                                                                                                                                                                                                                                                                                                                                                                                                                                                                                                                                                                                                                                                                    |                                                                                                                                                                                           |
|------------------------------------------------------------------------------------------------------------------------------------------------------------------------------------------------------------------------------------------------------------------------------------------------------------------------------------------------------------------------------------------------------------------------------------------------------------------------------------------------------------------------------------------------------------------------------------------------------------------------------------------------------------------------------------------------------------------------------------------------------------------------------------|-------------------------------------------------------------------------------------------------------------------------------------------------------------------------------------------|
| <p><b>1. Does the resident hear properly?</b></p> <p><input type="checkbox"/> Without difficulties and without aids      <input type="checkbox"/> Without troubles but with aids      <input type="checkbox"/> Unclear</p> <p><input type="checkbox"/> With limitations      <input type="checkbox"/> Without aids      <input type="checkbox"/> With aids</p> <p>Remarks: _____</p>                                                                                                                                                                                                                                                                                                                                                                                               | <p><b>What has to be done?</b></p> <p><input type="radio"/> Clarification necessary</p> <p><input type="radio"/> Interventions necessary</p> <p><input type="radio"/> Stays important</p> |
| <p><b>2. Can the resident see properly?</b></p> <p><input type="checkbox"/> Without difficulties and without aids      <input type="checkbox"/> Without troubles but with aids      <input type="checkbox"/> Unclear</p> <p><input type="checkbox"/> With limitations      <input type="checkbox"/> Without aids      <input type="checkbox"/> With aids</p> <p>Remarks: _____</p>                                                                                                                                                                                                                                                                                                                                                                                                 | <p><input type="radio"/> Clarification necessary</p> <p><input type="radio"/> Interventions necessary</p> <p><input type="radio"/> Stays important</p>                                    |
| <p><b>3. In what language can verbal communication with the resident take place?</b></p> <p><input type="checkbox"/> English      <input type="checkbox"/> Other languages: _____      <input type="checkbox"/> Unclear</p> <p>Remarks: _____</p>                                                                                                                                                                                                                                                                                                                                                                                                                                                                                                                                  | <p><input type="radio"/> Clarification necessary</p> <p><input type="radio"/> Interventions necessary</p> <p><input type="radio"/> Stays important</p>                                    |
| <p><b>4. Is the resident's verbal/nonverbal communication understandable to others?</b>      <input type="checkbox"/> Unclear</p> <p>Verbal:      <input type="checkbox"/> always      <input type="checkbox"/> sometimes      <input type="checkbox"/> never      Remarks: _____</p> <p>Nonverbal:      <input type="checkbox"/> always      <input type="checkbox"/> sometimes      <input type="checkbox"/> never      Remarks: _____</p>                                                                                                                                                                                                                                                                                                                                       | <p><input type="radio"/> Clarification necessary</p> <p><input type="radio"/> Interventions necessary</p> <p><input type="radio"/> Stays important</p>                                    |
| <p><b>5. If verbal communication with the resident is possible, in what form does it take place (quality of verbal communication)?</b></p> <p><input type="checkbox"/> Speaks in coherent sentences      <input type="checkbox"/> Uses single, but understandable words      <input type="checkbox"/> Unclear</p> <p><input type="checkbox"/> Uses word which do not make sense (for other people)      <input type="checkbox"/> Uses only sounds</p> <p>Remarks: _____</p>                                                                                                                                                                                                                                                                                                        | <p><input type="radio"/> Clarification necessary</p> <p><input type="radio"/> Interventions necessary</p> <p><input type="radio"/> Stays important</p>                                    |
| <p><b>6. Does the resident comprehend verbal / non verbal utterances made by others?</b>      <input type="checkbox"/> Unclear</p> <p><b>Comprehends verbal communication</b></p> <p><input type="checkbox"/> always      <input type="checkbox"/> sometimes      <input type="checkbox"/> never</p> <p><input type="checkbox"/> Reacts when being addressed      <input type="checkbox"/> Does not react when being addressed</p> <p>Remarks: _____</p> <p><b>Comprehends non verbal communication</b></p> <p><input type="checkbox"/> always      <input type="checkbox"/> sometimes      <input type="checkbox"/> never</p> <p><input type="checkbox"/> Reacts when being addressed      <input type="checkbox"/> Does not react when being addressed</p> <p>Remarks: _____</p> | <p><input type="radio"/> Clarification necessary</p> <p><input type="radio"/> Interventions necessary</p> <p><input type="radio"/> Stays important</p>                                    |

**IdA Innovative Dementia Orientated Assessment Tool**

**B: Communication**

|                                                                                                                                                                                                                                                                                                                                                                                                  |                                                                                                                                                                                       |
|--------------------------------------------------------------------------------------------------------------------------------------------------------------------------------------------------------------------------------------------------------------------------------------------------------------------------------------------------------------------------------------------------|---------------------------------------------------------------------------------------------------------------------------------------------------------------------------------------|
| <p><b>7. Can the resident comprehend written messages?</b></p> <p><input type="checkbox"/> always    <input type="checkbox"/> sometimes    <input type="checkbox"/> never    <input type="checkbox"/> Unclear</p> <p>Remarks: _____</p>                                                                                                                                                          | <p><b>What has to be done?</b></p> <p><input type="radio"/> Clarification necessary<br/> <input type="radio"/> Interventions necessary<br/> <input type="radio"/> Stays important</p> |
| <p><b>8. Does the resident clearly utter her/his own wishes and needs (verbally/non-verbally)?</b></p> <p><input type="checkbox"/> Usually clearly utters personal wishes/needs    <input type="checkbox"/> Seldom utters clearly personal wishes/needs    <input type="checkbox"/> Unclear</p> <p><input type="checkbox"/> Cannot clearly utter personal wishes/needs</p> <p>Remarks: _____</p> | <p><input type="radio"/> Clarification necessary<br/> <input type="radio"/> Interventions necessary<br/> <input type="radio"/> Stays important</p>                                    |
| <p><b>9. Is the resident capable of making contact to others?</b></p> <p><input type="checkbox"/> Yes    <input type="checkbox"/> No    <input type="checkbox"/> Unclear</p> <p>Remarks: _____</p>                                                                                                                                                                                               | <p><input type="radio"/> Clarification necessary<br/> <input type="radio"/> Interventions necessary<br/> <input type="radio"/> Stays important</p>                                    |

**Summary**

**B 1. Is it possible that the identified comprehension/ communication difficulties have triggered/ provoked the challenging behaviour?**  No

Hearing     Seeing well     Language of communication  
 Comprehensibility of speech     Quality of verbal communication     Understands verbal communication  
 Resident understands written language     Contact to others     Can communicate personal wishes/desires

**Probably yes** please take down possible correlations

---

To be taken into account in interactions with the resident     Plan interventions:

**B 2. Is it possible for the behaviour itself to present a form of communication and to explain the behaviour accordingly?**  No

**Probably yes** please take down possible correlations

---

To be taken into account in interactions with the resident     Plan interventions:

**IdA Innovative Dementia Orientated Assessment Tool**

**C: Personality and life style before the dementia**

|                                                                                                                                                                                                                                                                                                                                                                                                                                                                                                                                                                                                                                                                                                                                                                                                                                                                                                                                                                                                                                                                                                                                                                                                                                                                                                                                                                                                                                                                                                                                                                                                                                                                                                                                                                                                           |                                                                                                                                                                                                       |                                   |                                   |                       |   |                    |                              |   |              |                                       |   |                        |                                     |   |                                   |              |  |  |                                                                                                                                                                                                                                          |
|-----------------------------------------------------------------------------------------------------------------------------------------------------------------------------------------------------------------------------------------------------------------------------------------------------------------------------------------------------------------------------------------------------------------------------------------------------------------------------------------------------------------------------------------------------------------------------------------------------------------------------------------------------------------------------------------------------------------------------------------------------------------------------------------------------------------------------------------------------------------------------------------------------------------------------------------------------------------------------------------------------------------------------------------------------------------------------------------------------------------------------------------------------------------------------------------------------------------------------------------------------------------------------------------------------------------------------------------------------------------------------------------------------------------------------------------------------------------------------------------------------------------------------------------------------------------------------------------------------------------------------------------------------------------------------------------------------------------------------------------------------------------------------------------------------------|-------------------------------------------------------------------------------------------------------------------------------------------------------------------------------------------------------|-----------------------------------|-----------------------------------|-----------------------|---|--------------------|------------------------------|---|--------------|---------------------------------------|---|------------------------|-------------------------------------|---|-----------------------------------|--------------|--|--|------------------------------------------------------------------------------------------------------------------------------------------------------------------------------------------------------------------------------------------|
| <p><b>1. How can the resident's character/personality prior to the onset of dementia be described best? (e.g. ten years before the onset of dementia - more than one answer is possible)</b></p> <p style="text-align: center;">Please mark the tendencies with x</p> <table style="width: 100%; border-collapse: collapse;"> <tr> <td style="width: 50%; border-right: 1px solid black; padding: 5px;">Emotionally tough, robust</td> <td style="width: 10%; text-align: center; border-right: 1px solid black;">←</td> <td style="width: 40%; padding: 5px;">emotionally sensitive, vulnerable</td> </tr> <tr> <td style="border-right: 1px solid black; padding: 5px;">Extroverted, sociable</td> <td style="text-align: center; border-right: 1px solid black;">←</td> <td style="padding: 5px;">loner, introverted</td> </tr> <tr> <td style="border-right: 1px solid black; padding: 5px;">Willing to try something new</td> <td style="text-align: center; border-right: 1px solid black;">←</td> <td style="padding: 5px;">conservative</td> </tr> <tr> <td style="border-right: 1px solid black; padding: 5px;">Trustful, good-natured, ready to help</td> <td style="text-align: center; border-right: 1px solid black;">←</td> <td style="padding: 5px;">suspicious, egocentric</td> </tr> <tr> <td style="border-right: 1px solid black; padding: 5px;">Purposeful, reliable, sense of duty</td> <td style="text-align: center; border-right: 1px solid black;">←</td> <td style="padding: 5px;">inattentive, erratic, spontaneous</td> </tr> <tr> <td style="border-right: 1px solid black; padding: 5px;">Other: _____</td> <td></td> <td></td> </tr> </table> <p><input type="checkbox"/> Not known/not assessable <span style="float: right;"><input type="checkbox"/> Unclear</span></p> | Emotionally tough, robust                                                                                                                                                                             | ←                                 | emotionally sensitive, vulnerable | Extroverted, sociable | ← | loner, introverted | Willing to try something new | ← | conservative | Trustful, good-natured, ready to help | ← | suspicious, egocentric | Purposeful, reliable, sense of duty | ← | inattentive, erratic, spontaneous | Other: _____ |  |  | <p><b>What has to be done?</b></p> <ul style="list-style-type: none"> <li><input type="radio"/> Clarification necessary</li> <li><input type="radio"/> Interventions necessary</li> <li><input type="radio"/> Stays important</li> </ul> |
| Emotionally tough, robust                                                                                                                                                                                                                                                                                                                                                                                                                                                                                                                                                                                                                                                                                                                                                                                                                                                                                                                                                                                                                                                                                                                                                                                                                                                                                                                                                                                                                                                                                                                                                                                                                                                                                                                                                                                 | ←                                                                                                                                                                                                     | emotionally sensitive, vulnerable |                                   |                       |   |                    |                              |   |              |                                       |   |                        |                                     |   |                                   |              |  |  |                                                                                                                                                                                                                                          |
| Extroverted, sociable                                                                                                                                                                                                                                                                                                                                                                                                                                                                                                                                                                                                                                                                                                                                                                                                                                                                                                                                                                                                                                                                                                                                                                                                                                                                                                                                                                                                                                                                                                                                                                                                                                                                                                                                                                                     | ←                                                                                                                                                                                                     | loner, introverted                |                                   |                       |   |                    |                              |   |              |                                       |   |                        |                                     |   |                                   |              |  |  |                                                                                                                                                                                                                                          |
| Willing to try something new                                                                                                                                                                                                                                                                                                                                                                                                                                                                                                                                                                                                                                                                                                                                                                                                                                                                                                                                                                                                                                                                                                                                                                                                                                                                                                                                                                                                                                                                                                                                                                                                                                                                                                                                                                              | ←                                                                                                                                                                                                     | conservative                      |                                   |                       |   |                    |                              |   |              |                                       |   |                        |                                     |   |                                   |              |  |  |                                                                                                                                                                                                                                          |
| Trustful, good-natured, ready to help                                                                                                                                                                                                                                                                                                                                                                                                                                                                                                                                                                                                                                                                                                                                                                                                                                                                                                                                                                                                                                                                                                                                                                                                                                                                                                                                                                                                                                                                                                                                                                                                                                                                                                                                                                     | ←                                                                                                                                                                                                     | suspicious, egocentric            |                                   |                       |   |                    |                              |   |              |                                       |   |                        |                                     |   |                                   |              |  |  |                                                                                                                                                                                                                                          |
| Purposeful, reliable, sense of duty                                                                                                                                                                                                                                                                                                                                                                                                                                                                                                                                                                                                                                                                                                                                                                                                                                                                                                                                                                                                                                                                                                                                                                                                                                                                                                                                                                                                                                                                                                                                                                                                                                                                                                                                                                       | ←                                                                                                                                                                                                     | inattentive, erratic, spontaneous |                                   |                       |   |                    |                              |   |              |                                       |   |                        |                                     |   |                                   |              |  |  |                                                                                                                                                                                                                                          |
| Other: _____                                                                                                                                                                                                                                                                                                                                                                                                                                                                                                                                                                                                                                                                                                                                                                                                                                                                                                                                                                                                                                                                                                                                                                                                                                                                                                                                                                                                                                                                                                                                                                                                                                                                                                                                                                                              |                                                                                                                                                                                                       |                                   |                                   |                       |   |                    |                              |   |              |                                       |   |                        |                                     |   |                                   |              |  |  |                                                                                                                                                                                                                                          |
| <p><b>2. How high has the resident's stress and frustration tolerance been with regard to strain- and stressful situations?</b></p> <p><input type="checkbox"/> Stress tolerance at normal level (reacted balanced to stress situations) <span style="float: right;"><input type="checkbox"/> Unclear</span></p> <p><input type="checkbox"/> Low stress tolerance (easily stressed)</p> <p><input type="checkbox"/> High stress tolerance (could bear a lot of stress)</p> <p>Remarks: _____</p> <p><input type="checkbox"/> Not known/ not assessable</p>                                                                                                                                                                                                                                                                                                                                                                                                                                                                                                                                                                                                                                                                                                                                                                                                                                                                                                                                                                                                                                                                                                                                                                                                                                                | <ul style="list-style-type: none"> <li><input type="radio"/> Clarification necessary</li> <li><input type="radio"/> Interventions necessary</li> <li><input type="radio"/> Stays important</li> </ul> |                                   |                                   |                       |   |                    |                              |   |              |                                       |   |                        |                                     |   |                                   |              |  |  |                                                                                                                                                                                                                                          |
| <p><b>3. How did the resident usually cope with stressful situations before the onset of dementia (more than one answer is possible)?</b></p> <p><input type="checkbox"/> Rather active (for example movement/activity like sports, housework, crafting) <span style="float: right;"><input type="checkbox"/> Unclear</span></p> <p><input type="checkbox"/> Rather passive (for example relaxing through watching TV, listening to music, reading)</p> <p><input type="checkbox"/> Trough contact, talking to others</p> <p><input type="checkbox"/> Through being alone, introverted</p> <p><input type="checkbox"/> Being afraid, being reserved, unsure of herself/himself, giving up</p> <p><input type="checkbox"/> Over active, aggressive, very emotionally, short-tempered</p> <p>Other: _____</p> <p><input type="checkbox"/> Not known/not assessable</p>                                                                                                                                                                                                                                                                                                                                                                                                                                                                                                                                                                                                                                                                                                                                                                                                                                                                                                                                      | <ul style="list-style-type: none"> <li><input type="radio"/> Clarification necessary</li> <li><input type="radio"/> Interventions necessary</li> <li><input type="radio"/> Stays important</li> </ul> |                                   |                                   |                       |   |                    |                              |   |              |                                       |   |                        |                                     |   |                                   |              |  |  |                                                                                                                                                                                                                                          |

|                                                                                                                                                                                                                                                                                                                                                                                                                                                                                                                                                                                                                                                                                                                                                                                                                                                                                                                                                                                                                  |                                                                                                                                                                                                                                          |
|------------------------------------------------------------------------------------------------------------------------------------------------------------------------------------------------------------------------------------------------------------------------------------------------------------------------------------------------------------------------------------------------------------------------------------------------------------------------------------------------------------------------------------------------------------------------------------------------------------------------------------------------------------------------------------------------------------------------------------------------------------------------------------------------------------------------------------------------------------------------------------------------------------------------------------------------------------------------------------------------------------------|------------------------------------------------------------------------------------------------------------------------------------------------------------------------------------------------------------------------------------------|
| <p><b>4. Have there been any particular past situations or events which have been strongly threatening to the person or related to negative emotions (incisive events)?</b></p> <p><input type="checkbox"/> No      <input type="checkbox"/> Yes, which ones _____<br/>         _____<br/>         _____</p> <p><input type="checkbox"/> Not known/not assessable <span style="float: right;"><input type="checkbox"/> Unclear</span></p>                                                                                                                                                                                                                                                                                                                                                                                                                                                                                                                                                                        | <p><b>What has to be done?</b></p> <ul style="list-style-type: none"> <li><input type="radio"/> Clarification necessary</li> <li><input type="radio"/> Interventions necessary</li> <li><input type="radio"/> Stays important</li> </ul> |
| <p><b>5. Have there been any particular pleasant situations or events in the past which have had a positive influence on life or have been associated with strong positive feelings?</b></p> <p><input type="checkbox"/> No      <input type="checkbox"/> Yes, which ones _____<br/>         _____<br/>         _____</p> <p><input type="checkbox"/> Not known/not assessable <span style="float: right;"><input type="checkbox"/> Unclear</span></p>                                                                                                                                                                                                                                                                                                                                                                                                                                                                                                                                                           | <ul style="list-style-type: none"> <li><input type="radio"/> Clarification necessary</li> <li><input type="radio"/> Interventions necessary</li> <li><input type="radio"/> Stays important</li> </ul>                                    |
| <p><b>6. Which leisure-activities have been preferred by the resident prior to her/his dementia (more than one answer is possible)?</b></p> <ul style="list-style-type: none"> <li><input type="checkbox"/> Rather passive activities (for example watching TV, reading, listening to music, relaxing) <span style="float: right;"><input type="checkbox"/> Unclear</span></li> <li><input type="checkbox"/> Rather active activities (for example sports, gardening, dancing, hiking)</li> <li><input type="checkbox"/> Rather creative activities (for example drawing, knitting, tailoring, baking, playing music)</li> <li><input type="checkbox"/> Group activities (for example team games, playing cards, bowling, cooking together)</li> <li><input type="checkbox"/> Solidarity activities (for example individual sports, taking a stroll, museum visits, reading)</li> <li><input type="checkbox"/> Different activities: _____</li> <li><input type="checkbox"/> Not known/not assessable</li> </ul> | <ul style="list-style-type: none"> <li><input type="radio"/> Clarification necessary</li> <li><input type="radio"/> Interventions necessary</li> <li><input type="radio"/> Stays important</li> </ul>                                    |
| <p><b>7. Which kind of job/housework did the resident do before s/he fell ill (more than one answer is possible)?</b></p> <p>Please name the job: _____ <span style="float: right;"><input type="checkbox"/> Unclear</span></p> <ul style="list-style-type: none"> <li><input type="checkbox"/> Physically passive jobs (office work, driver, shop assistant)</li> <li><input type="checkbox"/> Physically active jobs (building, farming, housework)</li> <li><input type="checkbox"/> Much contact with other people at work</li> <li><input type="checkbox"/> Hardly any contact to other people while working</li> </ul>                                                                                                                                                                                                                                                                                                                                                                                     | <ul style="list-style-type: none"> <li><input type="radio"/> Clarification necessary</li> <li><input type="radio"/> Interventions necessary</li> <li><input type="radio"/> Stays important</li> </ul>                                    |
| <p><b>8. Has there been a stable daily rhythm or firm daily rituals to which the resident attached particular importance?</b></p> <p><input type="checkbox"/> No      <input type="checkbox"/> Yes, which one(s): _____ <span style="float: right;"><input type="checkbox"/> Unclear</span></p>                                                                                                                                                                                                                                                                                                                                                                                                                                                                                                                                                                                                                                                                                                                  | <ul style="list-style-type: none"> <li><input type="radio"/> Clarification necessary</li> <li><input type="radio"/> Interventions necessary</li> <li><input type="radio"/> Stays important</li> </ul>                                    |

Summary

**C 1. Can the challenging behaviour be an expression of the resident's personality?**

No

- Personality before the onset of dementia
- Management of stressful situations before the dementia
- Probably yes** please take down possible correlations
- Stress tolerance resp. frustration tolerance

To be taken into account in interactions with the resident

Plan interventions:

**C 2. Can the challenging behaviour be related to past life events or the person's former lifestyle?**

No

- Events, which were connected with negative emotions or events which were threatening
- Events which were associated with positive impact/emotions
- Leisure time before the onset of dementia
- Occupation
- Daily rhythm/daily rituals with special importance
- Probably yes** please take down possible correlations

To be taken into account in interactions with the resident

Plan interventions:

**C 3. Can the challenging behaviour be a reaction to stress?**

No

- Probably yes** please take down possible correlations

To be taken into account in interactions with the resident

Plan interventions:

**IdA Innovative Dementia Orientated Assessment Tool**

**D: Moods and emotions**

|                                                                                                                                                                                                                                                                                                                                                                                                                                                                                                                                                                                                                                                                                                                                                                                                                                                                                                                                                                                                       |                                                                                                                                                                                                                                          |   |   |   |   |   |   |   |    |    |    |     |     |   |   |   |   |   |   |   |    |    |    |    |     |   |   |   |   |   |   |   |   |    |    |    |     |   |   |   |   |   |   |   |   |    |    |    |                                                                                                                                                                                                       |
|-------------------------------------------------------------------------------------------------------------------------------------------------------------------------------------------------------------------------------------------------------------------------------------------------------------------------------------------------------------------------------------------------------------------------------------------------------------------------------------------------------------------------------------------------------------------------------------------------------------------------------------------------------------------------------------------------------------------------------------------------------------------------------------------------------------------------------------------------------------------------------------------------------------------------------------------------------------------------------------------------------|------------------------------------------------------------------------------------------------------------------------------------------------------------------------------------------------------------------------------------------|---|---|---|---|---|---|---|----|----|----|-----|-----|---|---|---|---|---|---|---|----|----|----|----|-----|---|---|---|---|---|---|---|---|----|----|----|-----|---|---|---|---|---|---|---|---|----|----|----|-------------------------------------------------------------------------------------------------------------------------------------------------------------------------------------------------------|
| <p><b>1. Does the resident convey the impression that s/he is scared?</b> <input type="checkbox"/> No</p> <p><input type="checkbox"/> sometimes      <input type="checkbox"/> often      <input type="checkbox"/> Not assessable      <input type="checkbox"/> Unclear</p>                                                                                                                                                                                                                                                                                                                                                                                                                                                                                                                                                                                                                                                                                                                            | <p><b>What has to be done?</b></p> <ul style="list-style-type: none"> <li><input type="radio"/> Clarification necessary</li> <li><input type="radio"/> Interventions necessary</li> <li><input type="radio"/> Stays important</li> </ul> |   |   |   |   |   |   |   |    |    |    |     |     |   |   |   |   |   |   |   |    |    |    |    |     |   |   |   |   |   |   |   |   |    |    |    |     |   |   |   |   |   |   |   |   |    |    |    |                                                                                                                                                                                                       |
| <p><b>2. Are there situations/times of the day that trigger states of anxiety?</b> <input type="checkbox"/> No</p> <p><input type="checkbox"/> Yes, which: _____ <input type="checkbox"/> Unclear</p> <p>_____</p> <p><input type="checkbox"/> Not assessable</p>                                                                                                                                                                                                                                                                                                                                                                                                                                                                                                                                                                                                                                                                                                                                     | <ul style="list-style-type: none"> <li><input type="radio"/> Clarification necessary</li> <li><input type="radio"/> Interventions necessary</li> <li><input type="radio"/> Stays important</li> </ul>                                    |   |   |   |   |   |   |   |    |    |    |     |     |   |   |   |   |   |   |   |    |    |    |    |     |   |   |   |   |   |   |   |   |    |    |    |     |   |   |   |   |   |   |   |   |    |    |    |                                                                                                                                                                                                       |
| <p><b>3. Does the resident convey the impression to be tired or fatigued?</b> <input type="checkbox"/> No</p> <p><input type="checkbox"/> Sometimes, at which times of the day? <input type="checkbox"/> Unclear</p> <table border="1" data-bbox="309 584 1563 616"> <tr> <td>1am</td><td>2</td><td>3</td><td>4</td><td>5</td><td>6</td><td>7</td><td>8</td><td>9</td><td>10</td><td>11</td><td>12</td> <td>1pm</td><td>2</td><td>3</td><td>4</td><td>5</td><td>6</td><td>7</td><td>8</td><td>9</td><td>10</td><td>11</td><td>12</td> </tr> </table> <p><input type="checkbox"/> Often, at which times of the day?</p> <table border="1" data-bbox="309 695 1563 727"> <tr> <td>1am</td><td>2</td><td>3</td><td>4</td><td>5</td><td>6</td><td>7</td><td>8</td><td>9</td><td>10</td><td>11</td><td>12</td> <td>1pm</td><td>2</td><td>3</td><td>4</td><td>5</td><td>6</td><td>7</td><td>8</td><td>9</td><td>10</td><td>11</td><td>12</td> </tr> </table> <p><input type="checkbox"/> Not assessable</p> | 1am                                                                                                                                                                                                                                      | 2 | 3 | 4 | 5 | 6 | 7 | 8 | 9  | 10 | 11 | 12  | 1pm | 2 | 3 | 4 | 5 | 6 | 7 | 8 | 9  | 10 | 11 | 12 | 1am | 2 | 3 | 4 | 5 | 6 | 7 | 8 | 9 | 10 | 11 | 12 | 1pm | 2 | 3 | 4 | 5 | 6 | 7 | 8 | 9 | 10 | 11 | 12 | <ul style="list-style-type: none"> <li><input type="radio"/> Clarification necessary</li> <li><input type="radio"/> Interventions necessary</li> <li><input type="radio"/> Stays important</li> </ul> |
| 1am                                                                                                                                                                                                                                                                                                                                                                                                                                                                                                                                                                                                                                                                                                                                                                                                                                                                                                                                                                                                   | 2                                                                                                                                                                                                                                        | 3 | 4 | 5 | 6 | 7 | 8 | 9 | 10 | 11 | 12 | 1pm | 2   | 3 | 4 | 5 | 6 | 7 | 8 | 9 | 10 | 11 | 12 |    |     |   |   |   |   |   |   |   |   |    |    |    |     |   |   |   |   |   |   |   |   |    |    |    |                                                                                                                                                                                                       |
| 1am                                                                                                                                                                                                                                                                                                                                                                                                                                                                                                                                                                                                                                                                                                                                                                                                                                                                                                                                                                                                   | 2                                                                                                                                                                                                                                        | 3 | 4 | 5 | 6 | 7 | 8 | 9 | 10 | 11 | 12 | 1pm | 2   | 3 | 4 | 5 | 6 | 7 | 8 | 9 | 10 | 11 | 12 |    |     |   |   |   |   |   |   |   |   |    |    |    |     |   |   |   |   |   |   |   |   |    |    |    |                                                                                                                                                                                                       |
| <p><b>4. Are there certain events/ situations which exhaust or tire out the resident?</b> <input type="checkbox"/> No</p> <p><input type="checkbox"/> Yes, which: _____ <input type="checkbox"/> Unclear</p> <p>_____</p> <p><input type="checkbox"/> Not assessable</p>                                                                                                                                                                                                                                                                                                                                                                                                                                                                                                                                                                                                                                                                                                                              | <ul style="list-style-type: none"> <li><input type="radio"/> Clarification necessary</li> <li><input type="radio"/> Interventions necessary</li> <li><input type="radio"/> Stays important</li> </ul>                                    |   |   |   |   |   |   |   |    |    |    |     |     |   |   |   |   |   |   |   |    |    |    |    |     |   |   |   |   |   |   |   |   |    |    |    |     |   |   |   |   |   |   |   |   |    |    |    |                                                                                                                                                                                                       |
| <p><b>5. Does the resident convey the impression of loneliness or isolation?</b> <input type="checkbox"/> Unclear</p> <p><input type="checkbox"/> Sometimes, at which times of the day?</p> <table border="1" data-bbox="309 1050 1563 1082"> <tr> <td>1am</td><td>2</td><td>3</td><td>4</td><td>5</td><td>6</td><td>7</td><td>8</td><td>9</td><td>10</td><td>11</td><td>12</td> <td>1pm</td><td>2</td><td>3</td><td>4</td><td>5</td><td>6</td><td>7</td><td>8</td><td>9</td><td>10</td><td>11</td><td>12</td> </tr> </table> <p><input type="checkbox"/> Often, at which times of the day?</p> <table border="1" data-bbox="309 1161 1563 1193"> <tr> <td>1am</td><td>2</td><td>3</td><td>4</td><td>5</td><td>6</td><td>7</td><td>8</td><td>9</td><td>10</td><td>11</td><td>12</td> <td>1pm</td><td>2</td><td>3</td><td>4</td><td>5</td><td>6</td><td>7</td><td>8</td><td>9</td><td>10</td><td>11</td><td>12</td> </tr> </table> <p><input type="checkbox"/> Not assessable</p>                      | 1am                                                                                                                                                                                                                                      | 2 | 3 | 4 | 5 | 6 | 7 | 8 | 9  | 10 | 11 | 12  | 1pm | 2 | 3 | 4 | 5 | 6 | 7 | 8 | 9  | 10 | 11 | 12 | 1am | 2 | 3 | 4 | 5 | 6 | 7 | 8 | 9 | 10 | 11 | 12 | 1pm | 2 | 3 | 4 | 5 | 6 | 7 | 8 | 9 | 10 | 11 | 12 | <ul style="list-style-type: none"> <li><input type="radio"/> Clarification necessary</li> <li><input type="radio"/> Interventions necessary</li> <li><input type="radio"/> Stays important</li> </ul> |
| 1am                                                                                                                                                                                                                                                                                                                                                                                                                                                                                                                                                                                                                                                                                                                                                                                                                                                                                                                                                                                                   | 2                                                                                                                                                                                                                                        | 3 | 4 | 5 | 6 | 7 | 8 | 9 | 10 | 11 | 12 | 1pm | 2   | 3 | 4 | 5 | 6 | 7 | 8 | 9 | 10 | 11 | 12 |    |     |   |   |   |   |   |   |   |   |    |    |    |     |   |   |   |   |   |   |   |   |    |    |    |                                                                                                                                                                                                       |
| 1am                                                                                                                                                                                                                                                                                                                                                                                                                                                                                                                                                                                                                                                                                                                                                                                                                                                                                                                                                                                                   | 2                                                                                                                                                                                                                                        | 3 | 4 | 5 | 6 | 7 | 8 | 9 | 10 | 11 | 12 | 1pm | 2   | 3 | 4 | 5 | 6 | 7 | 8 | 9 | 10 | 11 | 12 |    |     |   |   |   |   |   |   |   |   |    |    |    |     |   |   |   |   |   |   |   |   |    |    |    |                                                                                                                                                                                                       |
| <p><b>6. Are there people, who have a closer relationship with the resident?</b> <input type="checkbox"/> No</p> <p><input type="checkbox"/> Yes, which people: _____ <input type="checkbox"/> Unclear</p>                                                                                                                                                                                                                                                                                                                                                                                                                                                                                                                                                                                                                                                                                                                                                                                            | <ul style="list-style-type: none"> <li><input type="radio"/> Clarification necessary</li> <li><input type="radio"/> Interventions necessary</li> <li><input type="radio"/> Stays important</li> </ul>                                    |   |   |   |   |   |   |   |    |    |    |     |     |   |   |   |   |   |   |   |    |    |    |    |     |   |   |   |   |   |   |   |   |    |    |    |     |   |   |   |   |   |   |   |   |    |    |    |                                                                                                                                                                                                       |



Summary

**D 1. Can the challenging behaviour be an expression of certain moods and emotions?**

No

Being afraid

Tiredness/exhaustion

Closer relationship to the resident

Relationship show confidence, safety etc.

Times without occupation

Boredom

Occupational activities/leisure time activities/structure of the day do not match the residents personal preferences

**Probably yes** please take down possible correlations

To be taken into account in interactions with the resident

Plan interventions:

**D 2. Can the challenging behaviour serve as self-stimulation?**

No

**Probably yes** please take down possible correlations

To be taken into account in interactions with the resident

Plan interventions:



**IdA Innovative Dementia Orientated Assessment Tool**

**E: Environmental influences**

|                                                                                                                                                                                                                                                                                                                                                                                                                                                                                                                                                                                                                                                                                                                                                                                                                                             |                                                                                                                                                                                                                                          |
|---------------------------------------------------------------------------------------------------------------------------------------------------------------------------------------------------------------------------------------------------------------------------------------------------------------------------------------------------------------------------------------------------------------------------------------------------------------------------------------------------------------------------------------------------------------------------------------------------------------------------------------------------------------------------------------------------------------------------------------------------------------------------------------------------------------------------------------------|------------------------------------------------------------------------------------------------------------------------------------------------------------------------------------------------------------------------------------------|
| <p><b>1. What characterizes the environment in which the resident spends most of her/his time?</b></p> <p><b>a. Lighting?</b> <span style="float: right;"><input type="checkbox"/> Unclear</span></p> <p><input type="checkbox"/> dark <span style="margin-left: 150px;"><input type="checkbox"/> bright/harsh</span></p> <p><input type="checkbox"/> A lot of shadows/reflections <span style="margin-left: 100px;"><input type="checkbox"/> Unpleasant/cold light</span></p> <p><input type="checkbox"/> Same lighting throughout the day <span style="margin-left: 100px;"><input type="checkbox"/> Light which cannot be adjusted individually</span></p> <p><input type="checkbox"/> Lighting at night</p> <p><input type="checkbox"/> Does not fit <span style="margin-left: 150px;"><input type="checkbox"/> Other: _____</span></p> | <p><b>What has to be done?</b></p> <ul style="list-style-type: none"> <li><input type="radio"/> Clarification necessary</li> <li><input type="radio"/> Interventions necessary</li> <li><input type="radio"/> Stays important</li> </ul> |
| <p><b>i. Noises in the environment?</b> <span style="float: right;"><input type="checkbox"/> Unclear</span></p> <p><input type="checkbox"/> noisy <span style="margin-left: 150px;"><input type="checkbox"/> quiet</span></p> <p><input type="checkbox"/> Many different noises, permanent music, telephone, signal of nurse call button etc.</p> <p><input type="checkbox"/> Does not fit <span style="margin-left: 150px;"><input type="checkbox"/> Other: _____</span></p>                                                                                                                                                                                                                                                                                                                                                               | <ul style="list-style-type: none"> <li><input type="radio"/> Clarification necessary</li> <li><input type="radio"/> Interventions necessary</li> <li><input type="radio"/> Stays important</li> </ul>                                    |
| <p><b>b. Smells/odours?</b> <span style="float: right;"><input type="checkbox"/> Unclear</span></p> <p><input type="checkbox"/> Unpleasant smells <span style="margin-left: 150px;"><input type="checkbox"/> Many different smells</span></p> <p><input type="checkbox"/> No homely/known smells</p> <p><input type="checkbox"/> Does not fit <span style="margin-left: 150px;"><input type="checkbox"/> Other: _____</span></p>                                                                                                                                                                                                                                                                                                                                                                                                            | <ul style="list-style-type: none"> <li><input type="radio"/> Clarification necessary</li> <li><input type="radio"/> Interventions necessary</li> <li><input type="radio"/> Stays important</li> </ul>                                    |
| <p><b>c. The furnishing / the equipment?</b> <span style="float: right;"><input type="checkbox"/> Unclear</span></p> <p><input type="checkbox"/> Not personal <span style="margin-left: 150px;"><input type="checkbox"/> Only practical, not home like</span></p> <p><input type="checkbox"/> Uncomfortable/unfriendly</p> <p><input type="checkbox"/> Does not fit <span style="margin-left: 150px;"><input type="checkbox"/> Other: _____</span></p>                                                                                                                                                                                                                                                                                                                                                                                      | <ul style="list-style-type: none"> <li><input type="radio"/> Clarification necessary</li> <li><input type="radio"/> Interventions necessary</li> <li><input type="radio"/> Stays important</li> </ul>                                    |
| <p><b>d. Sense of safety/familiarity?</b> <span style="float: right;"><input type="checkbox"/> Unclear</span></p> <p><input type="checkbox"/> Strange, unknown surroundings <span style="margin-left: 100px;"><input type="checkbox"/> People I do not recognize</span></p> <p><input type="checkbox"/> No obvious orientation signs/no orientation signs that suit cognitive abilities</p> <p><input type="checkbox"/> Danger of injuries/falls <span style="margin-left: 100px;"><input type="checkbox"/> Danger of getting lost</span></p> <p><input type="checkbox"/> Restricted movement</p> <p><input type="checkbox"/> Does not fit <span style="margin-left: 150px;"><input type="checkbox"/> Other: _____</span></p>                                                                                                               | <ul style="list-style-type: none"> <li><input type="radio"/> Clarification necessary</li> <li><input type="radio"/> Interventions necessary</li> <li><input type="radio"/> Stays important</li> </ul>                                    |

**IdA Innovative Dementia Orientated Assessment Tool**

**E: Environmental influences**

|                                                                                                                                                                                                                                                                                                                                                                                                                                                                                                                                                                                                                                                                                                                                                                                                                                                                                                                                                                                                                                                                                                                                                                                                                                  |                                                                                                                                                                                           |
|----------------------------------------------------------------------------------------------------------------------------------------------------------------------------------------------------------------------------------------------------------------------------------------------------------------------------------------------------------------------------------------------------------------------------------------------------------------------------------------------------------------------------------------------------------------------------------------------------------------------------------------------------------------------------------------------------------------------------------------------------------------------------------------------------------------------------------------------------------------------------------------------------------------------------------------------------------------------------------------------------------------------------------------------------------------------------------------------------------------------------------------------------------------------------------------------------------------------------------|-------------------------------------------------------------------------------------------------------------------------------------------------------------------------------------------|
| <p><b>1. What characterizes the environment in which the resident spends most of her/his time?</b></p> <p><i>a. Sense of privacy?</i> <span style="float: right;"><input type="checkbox"/> Unclear</span></p> <p><input type="checkbox"/> No possibility to be on ones' own/to retreat <span style="margin-left: 150px;"><input type="checkbox"/> No protected privacy</span></p> <p><input type="checkbox"/> No possibility to fulfill private desires <span style="margin-left: 150px;"><input type="checkbox"/> No possibility for ones' own time structure</span></p> <p><input type="checkbox"/> No individual daily rhythm</p> <p><input type="checkbox"/> Does not fit <span style="margin-left: 100px;"><input type="checkbox"/> Other: _____</span></p>                                                                                                                                                                                                                                                                                                                                                                                                                                                                 | <p><b>What has to be done?</b></p> <p><input type="radio"/> Clarification necessary</p> <p><input type="radio"/> Interventions necessary</p> <p><input type="radio"/> Stays important</p> |
| <p><i>b. Positive stimuli/stimulation (persons or objects)?</i> <span style="float: right;"><input type="checkbox"/> Unclear</span></p> <p><input type="checkbox"/> A little/few stimuli, boring surroundings (understimulation)</p> <p><input type="checkbox"/> Lots of stimuli (overstimulation)</p> <p><input type="checkbox"/> Does not fit <span style="margin-left: 100px;"><input type="checkbox"/> Other: _____</span></p>                                                                                                                                                                                                                                                                                                                                                                                                                                                                                                                                                                                                                                                                                                                                                                                               | <p><input type="radio"/> Clarification necessary</p> <p><input type="radio"/> Interventions necessary</p> <p><input type="radio"/> Stays important</p>                                    |
| <p><b>2. Does the resident's environment provide enough chances for making contact with others?</b> <input type="checkbox"/> Yes <input type="checkbox"/> No <span style="float: right;"><input type="checkbox"/> Unclear</span></p> <p><input type="checkbox"/> No possibility to get in touch without help <span style="margin-left: 150px;"><input type="checkbox"/> Long time intervals without verbal stimulation</span></p> <p><input type="checkbox"/> No persons who fit the resident's communication interests and levels</p> <p><input type="checkbox"/> Other: _____</p>                                                                                                                                                                                                                                                                                                                                                                                                                                                                                                                                                                                                                                              | <p><input type="radio"/> Clarification necessary</p> <p><input type="radio"/> Interventions necessary</p> <p><input type="radio"/> Stays important</p>                                    |
| <p><b>3. Does the resident prefer certain carer/ caregivers as significant others (closer relationship, easier intercourse, more profound quality of relationship, empathy, gender)?</b></p> <p><input type="checkbox"/> Yes: Please take notes (cues) _____</p>                                                                                                                                                                                                                                                                                                                                                                                                                                                                                                                                                                                                                                                                                                                                                                                                                                                                                                                                                                 | <p><input type="radio"/> Clarification necessary</p> <p><input type="radio"/> Interventions necessary</p> <p><input type="radio"/> Stays important</p>                                    |
| <p><b>4. How long is an individual caregiver responsible for a certain resident?</b> <span style="float: right;"><input type="checkbox"/> Unclear</span></p> <p><input type="checkbox"/> Same caregiver for the week including weekend in the <span style="margin-left: 150px;"><input type="checkbox"/> Early day shift</span> <span style="margin-left: 100px;"><input type="checkbox"/> Late day shift</span></p> <p><input type="checkbox"/> Same caregiver throughout the week excluding weekend in the <span style="margin-left: 150px;"><input type="checkbox"/> Early day shift</span> <span style="margin-left: 100px;"><input type="checkbox"/> Late day shift</span></p> <p><input type="checkbox"/> Same caregiver at least three days a week in the <span style="margin-left: 150px;"><input type="checkbox"/> Early day shift</span> <span style="margin-left: 100px;"><input type="checkbox"/> Late day shift</span></p> <p><input type="checkbox"/> Different/new caregiver every day in the <span style="margin-left: 150px;"><input type="checkbox"/> Early day shift</span> <span style="margin-left: 100px;"><input type="checkbox"/> Late day shift</span></p> <p><input type="checkbox"/> Other: _____</p> | <p><input type="radio"/> Clarification necessary</p> <p><input type="radio"/> Interventions necessary</p> <p><input type="radio"/> Stays important</p>                                    |

Summary

**E 1. Can the challenging behaviour have to do with certain environmental characteristics?**  No

Lighting       Noise in the surroundings       Smells  
 Furnishing       Privacy       Getting in touch with others       Positive stimuli/stimulations  
 **Probably yes** please take down possible correlations

---

To be taken into account in interactions with the resident       Plan interventions:

**E 2. Can the challenging behaviour have to do with a lacking sense of security and familiarity?**  No

**Probably yes** please take down possible correlations

---

To be taken into account in interactions with the resident       Plan interventions:

**E 3. Can staff structure have an impact on the challenging behaviour?**  No

Preference of caregiver       As a primary caregiver       Continuity of primary caregivers  
 **Probably yes** please take down possible correlations

---

To be taken into account in interactions with the resident       Plan interventions:
